# Supplementary figures and images for: A visual circuit uses complementary mechanisms to support transient and sustained pupil constriction
Source: eLife journal article supplement (doi:10.7554/elife.15392), 2016-09-26

Figure 4—figure supplement 1

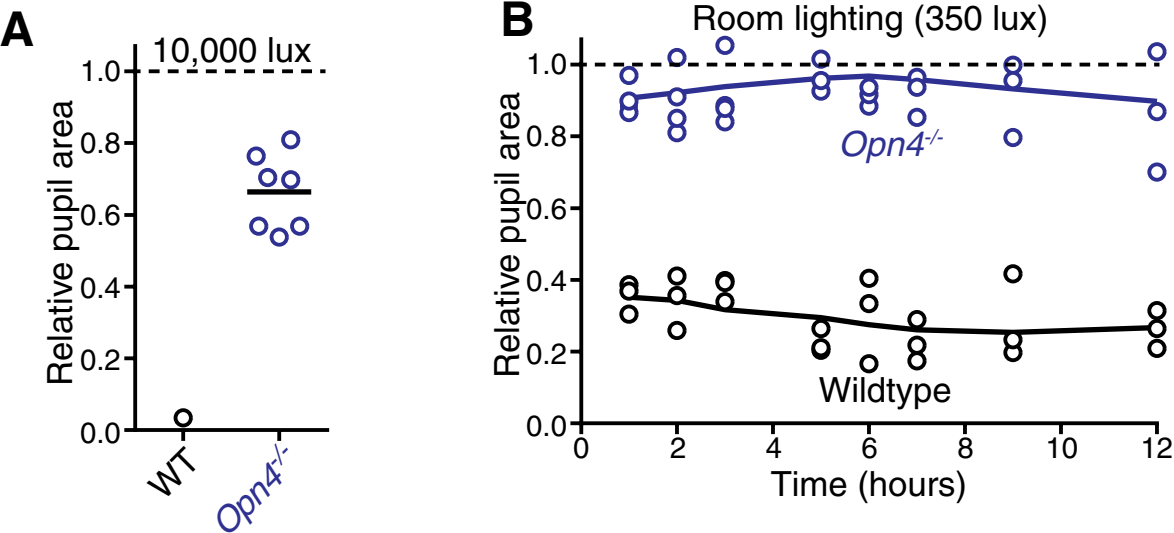

Supplement: supp [file elife-15392-supp-v2.zip]

Figure 2—figure supplement 4

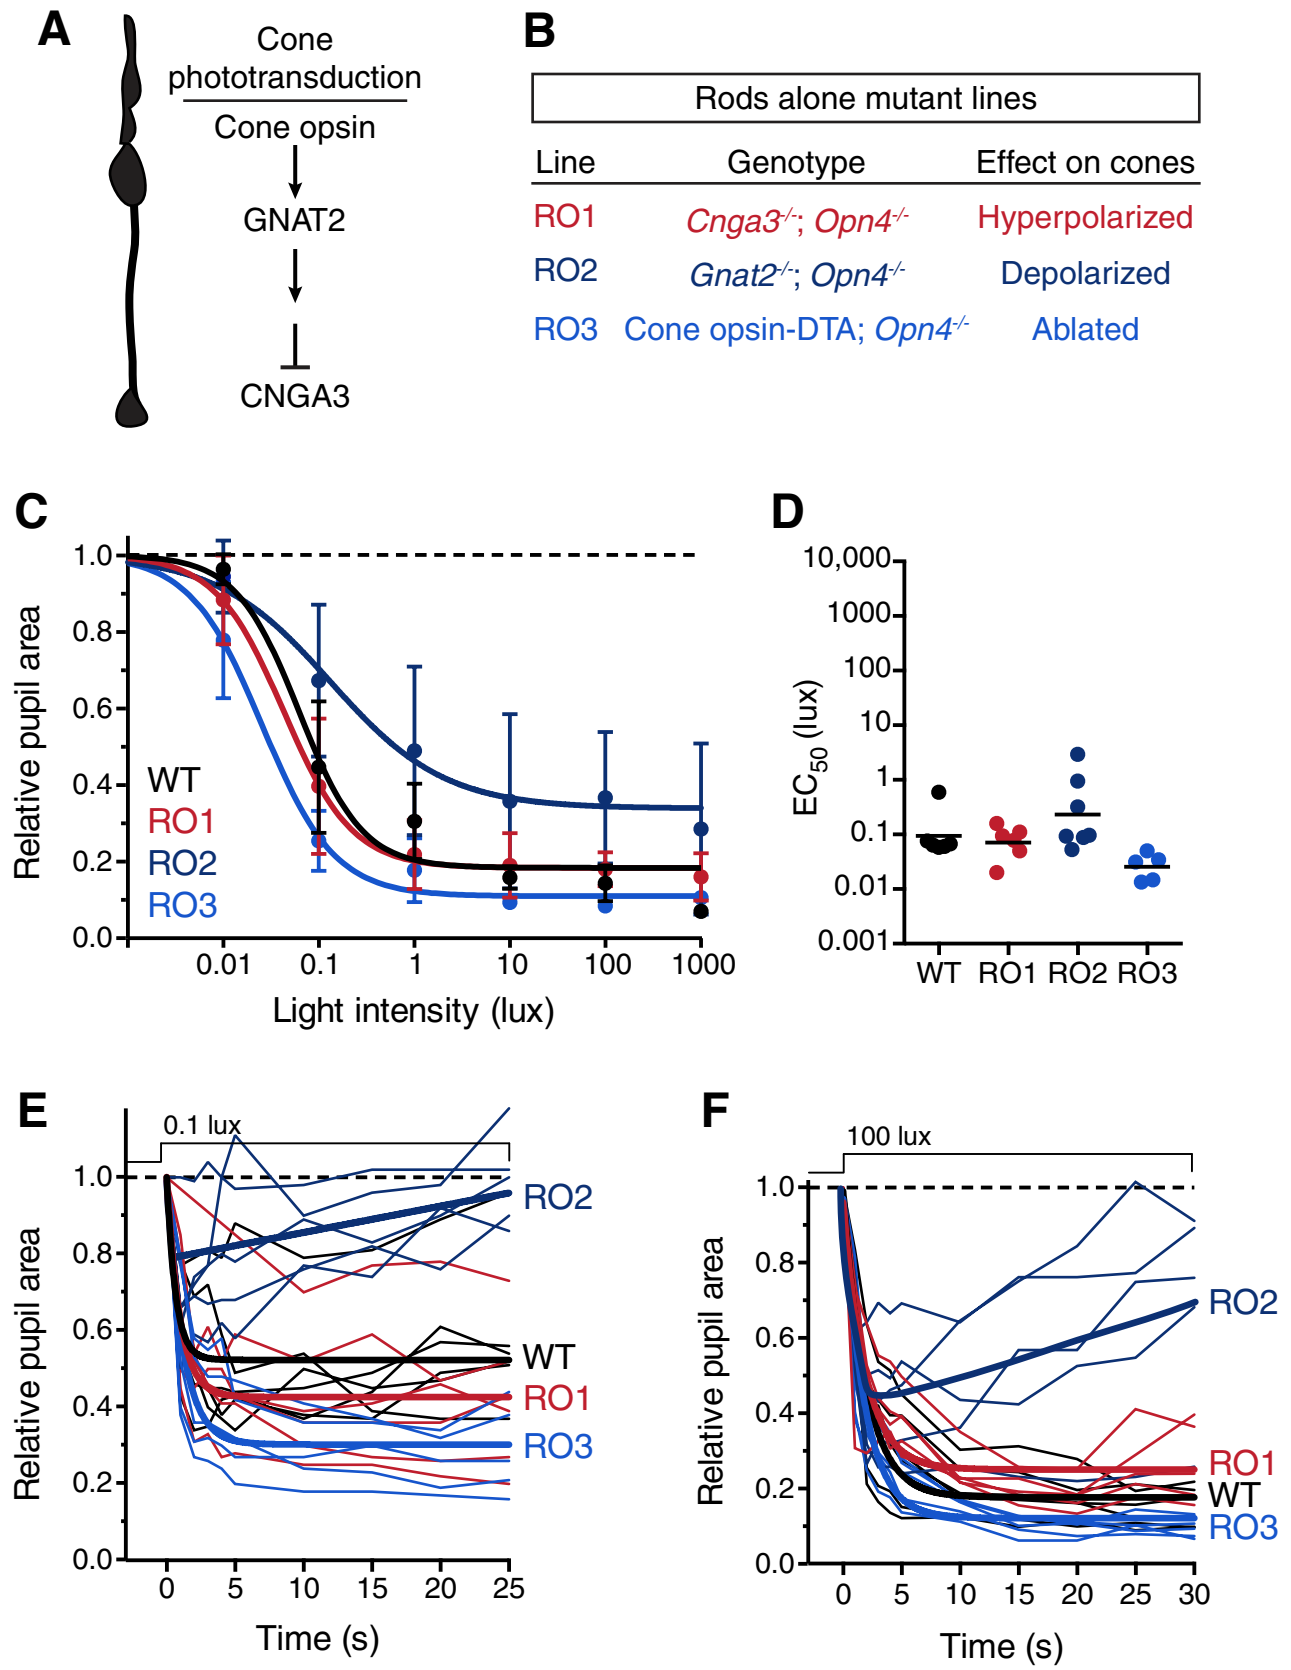

Supplement: supp [file elife-15392-supp-v2.zip]

Figure 4—figure supplement 3

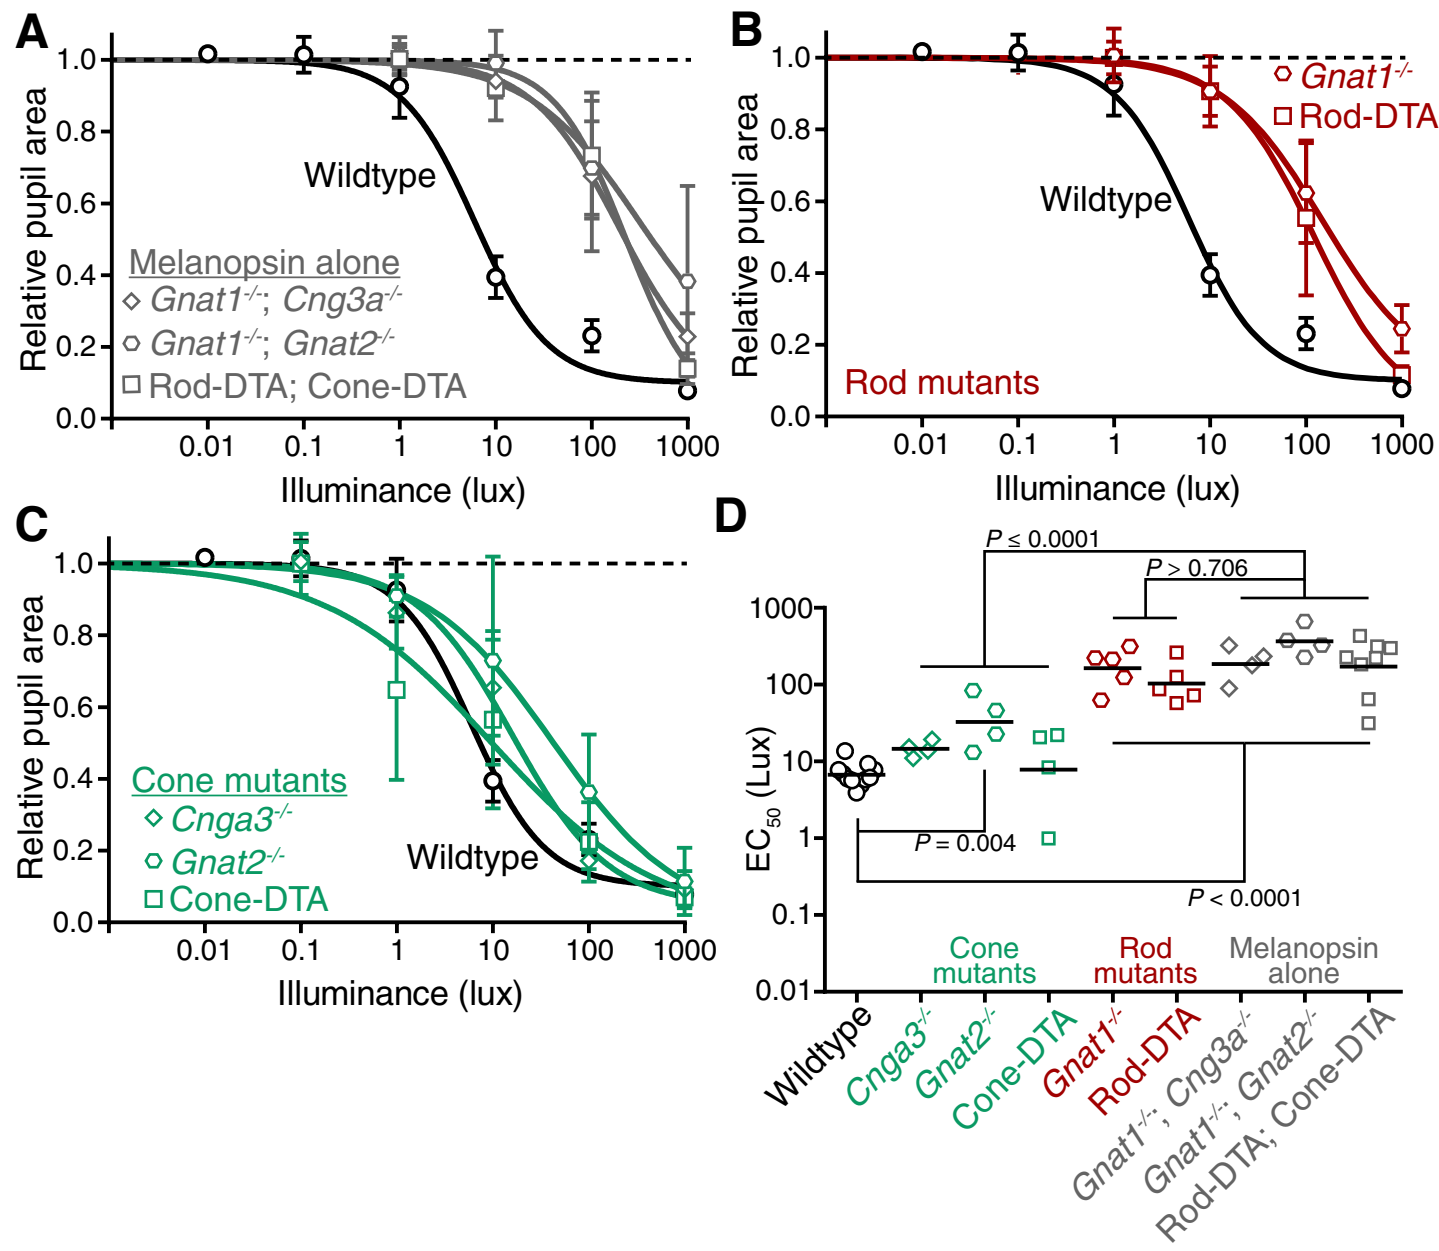

Supplement: supp [file elife-15392-supp-v2.zip]

Figure 4—figure supplement 4

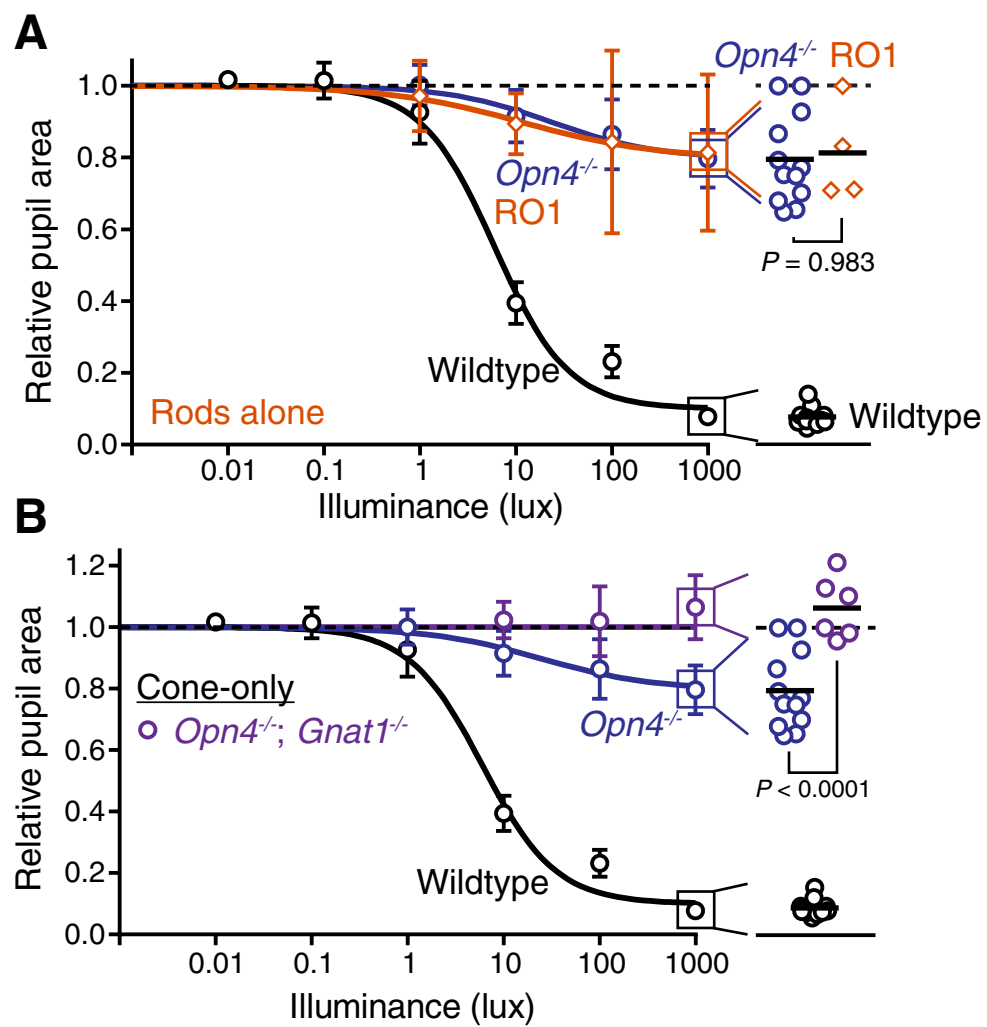

Supplement: supp [file elife-15392-supp-v2.zip]

Figure 3—figure supplement 3

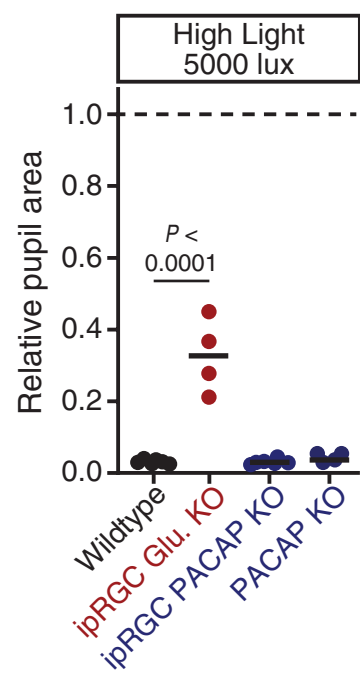

Supplement: supp [file elife-15392-supp-v2.zip]

Figure 6—figure supplement 1

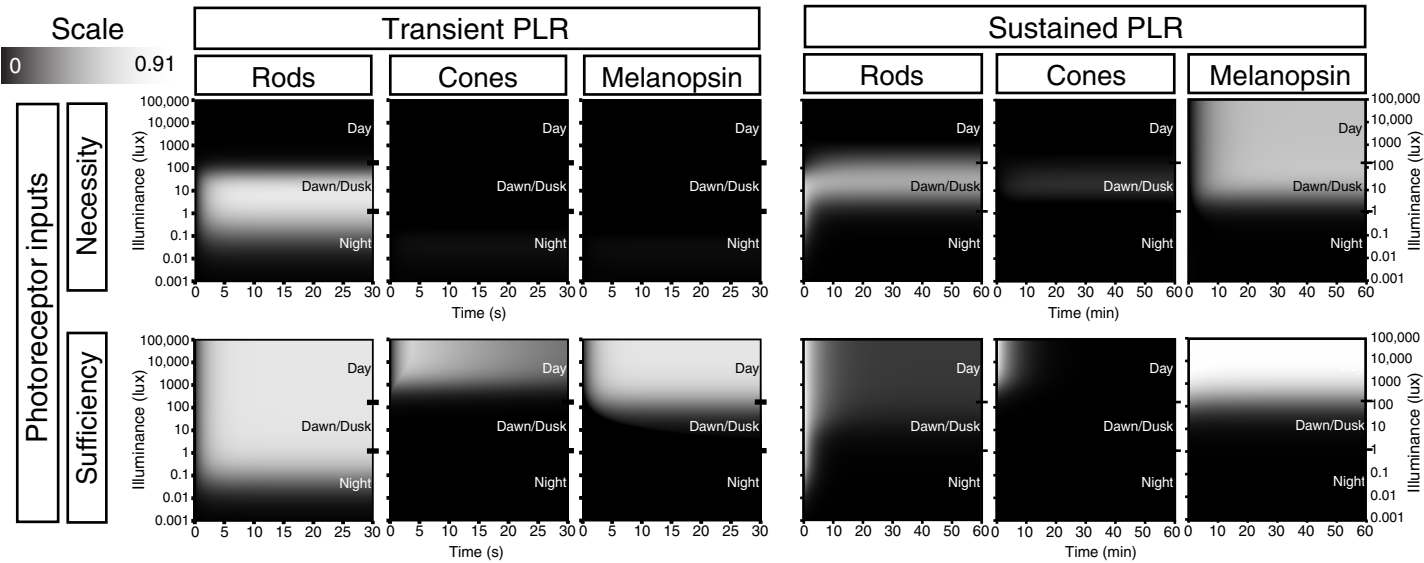

Supplement: supp [file elife-15392-supp-v2.zip]

Figure 3—figure supplement 2

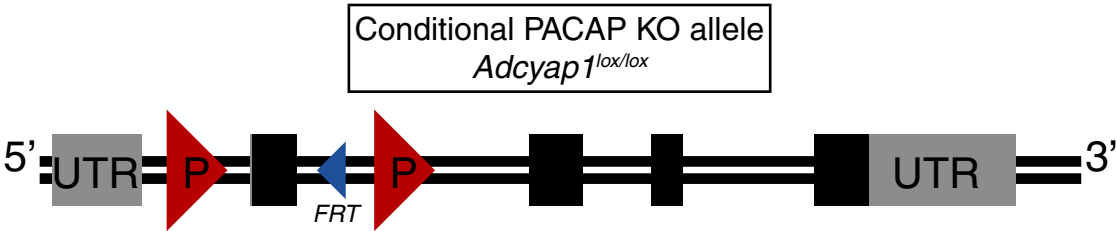

Supplement: supp [file elife-15392-supp-v2.zip]

Figure 4—figure supplement 2

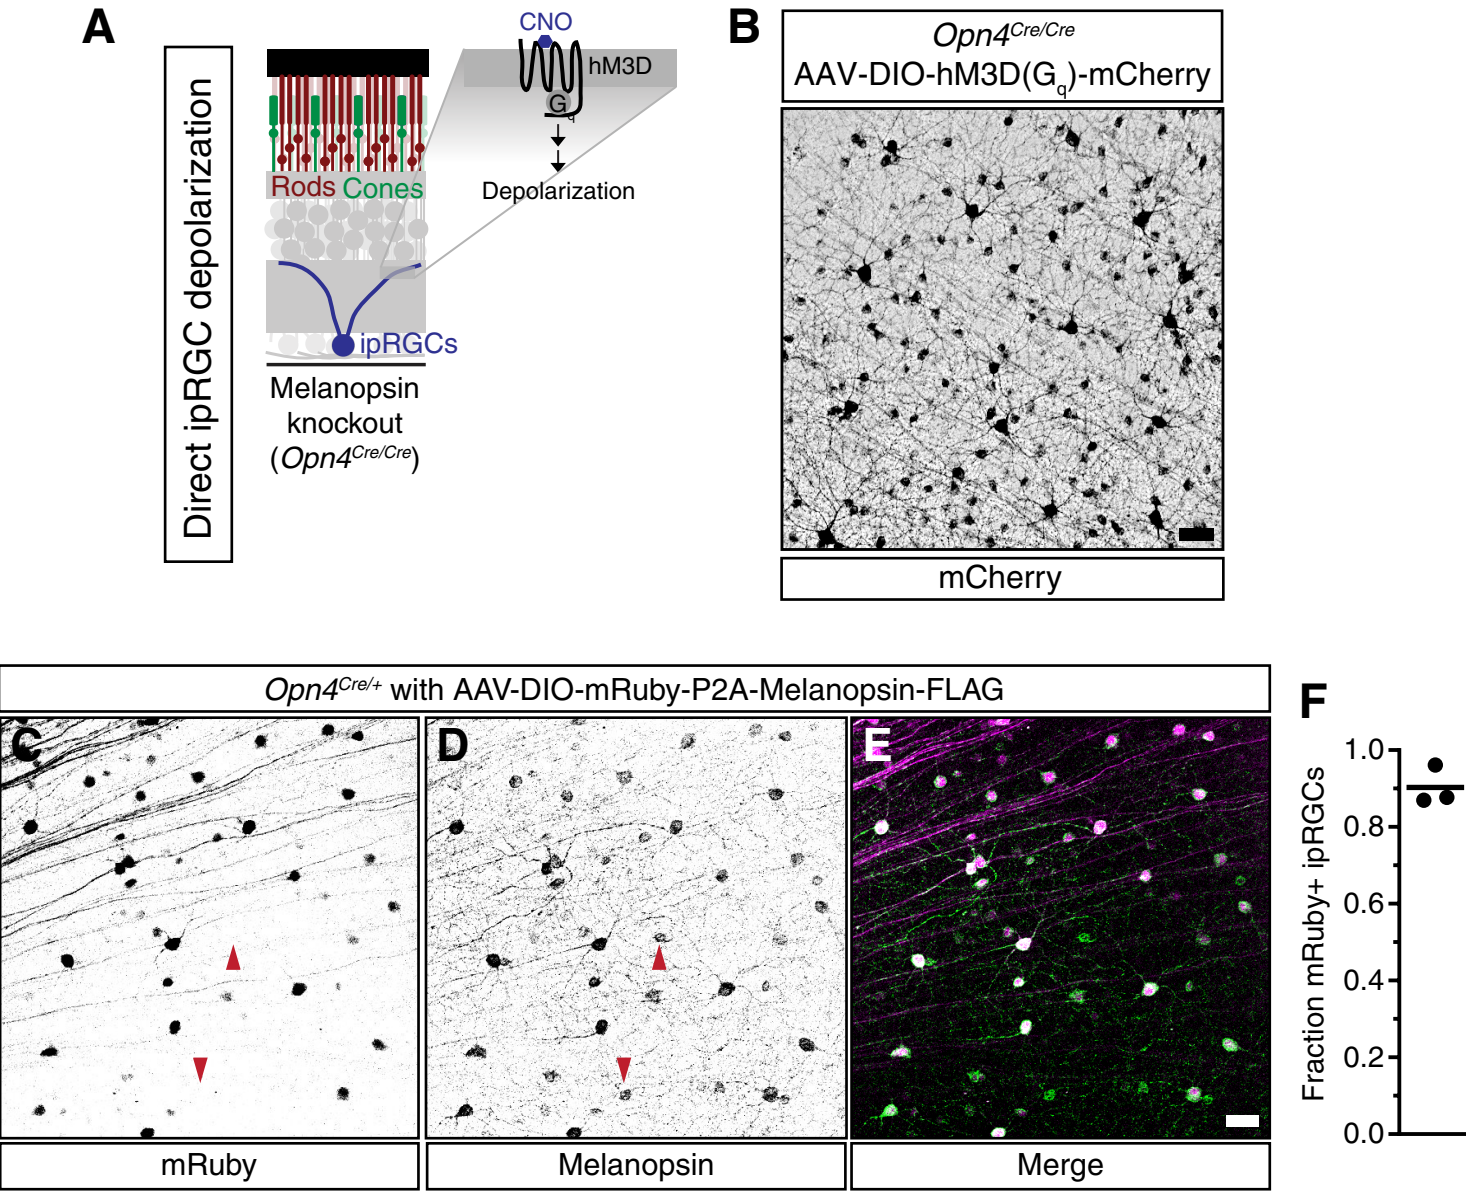

Supplement: supp [file elife-15392-supp-v2.zip]

Figure 2—figure supplement 3

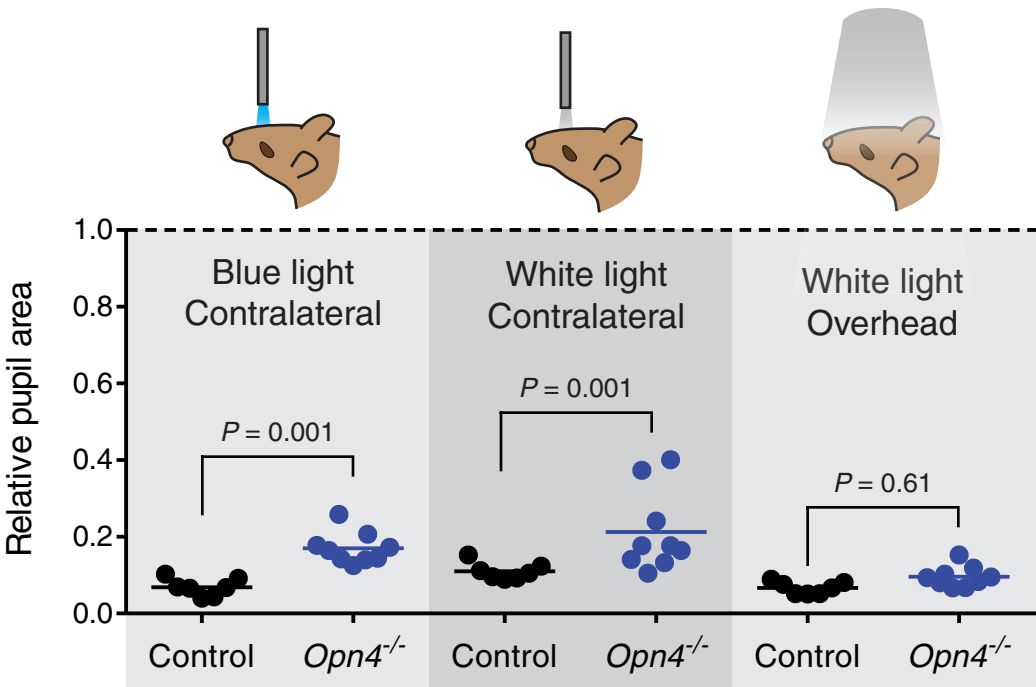

Supplement: supp [file elife-15392-supp-v2.zip]

Figure 1—figure supplement 2

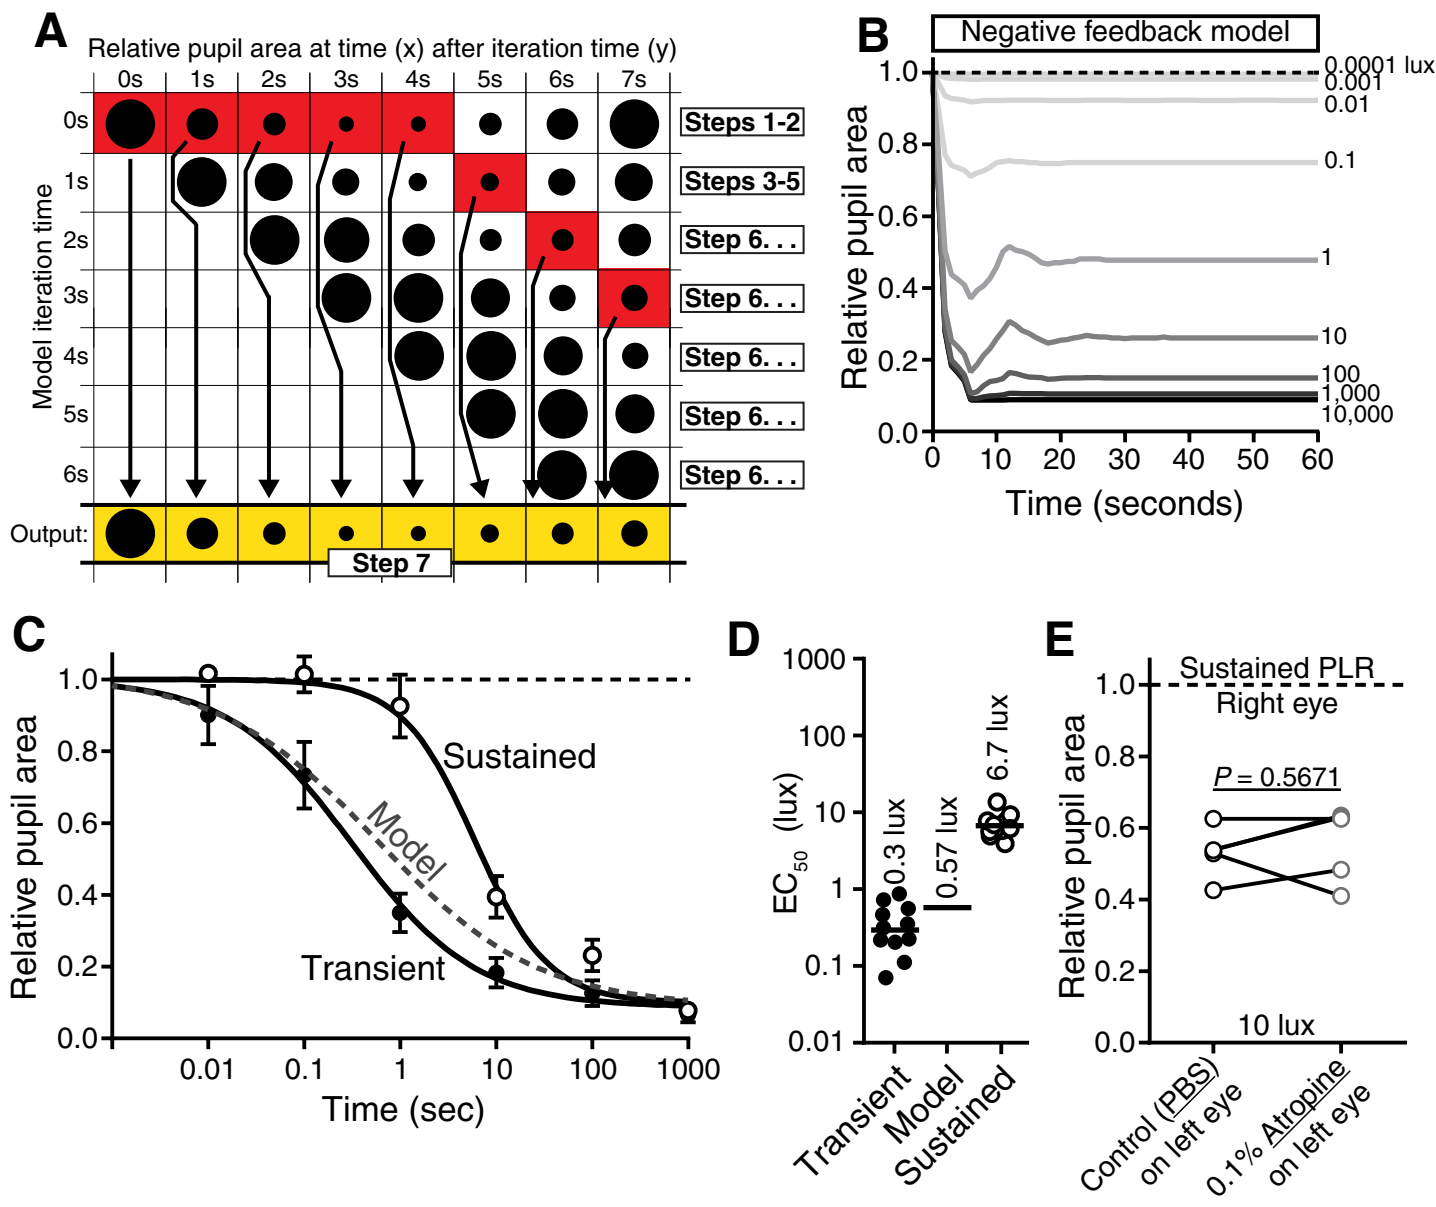

Supplement: supp [file elife-15392-supp-v2.zip]

Figure 2—figure supplement 1

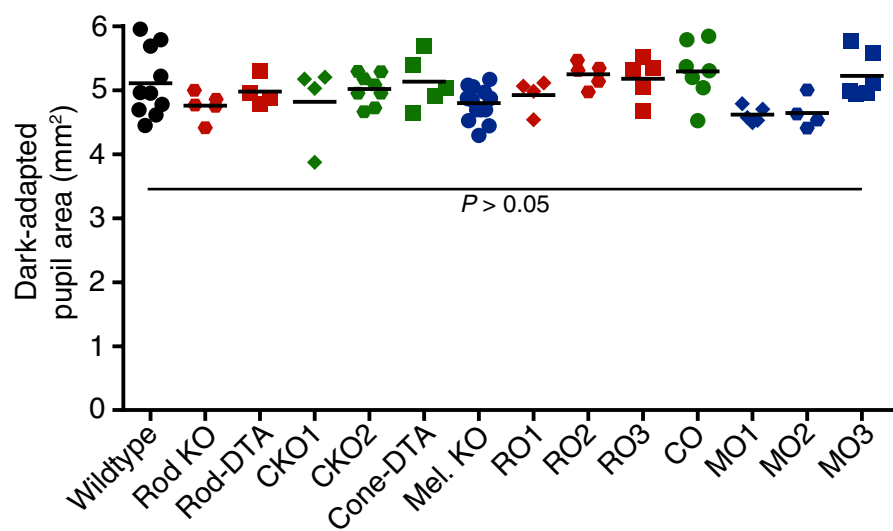

Supplement: supp [file elife-15392-supp-v2.zip]

Figure 2—figure supplement 2

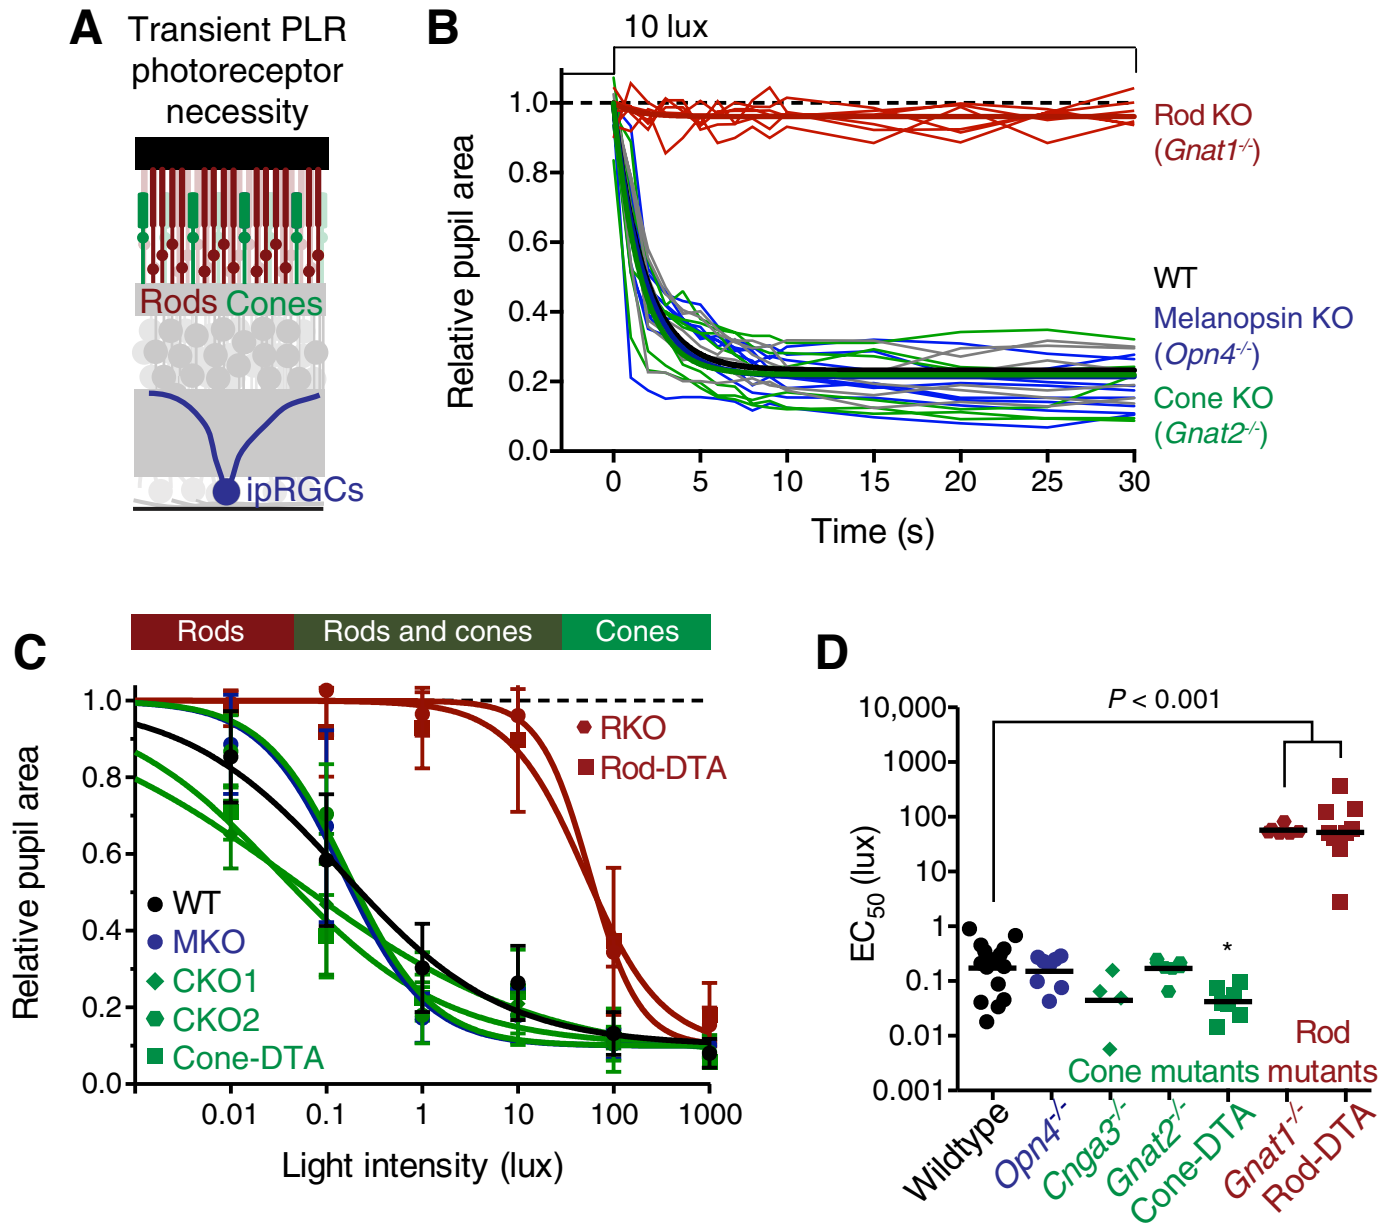

Supplement: supp [file elife-15392-supp-v2.zip]

Figure 1—figure supplement 1

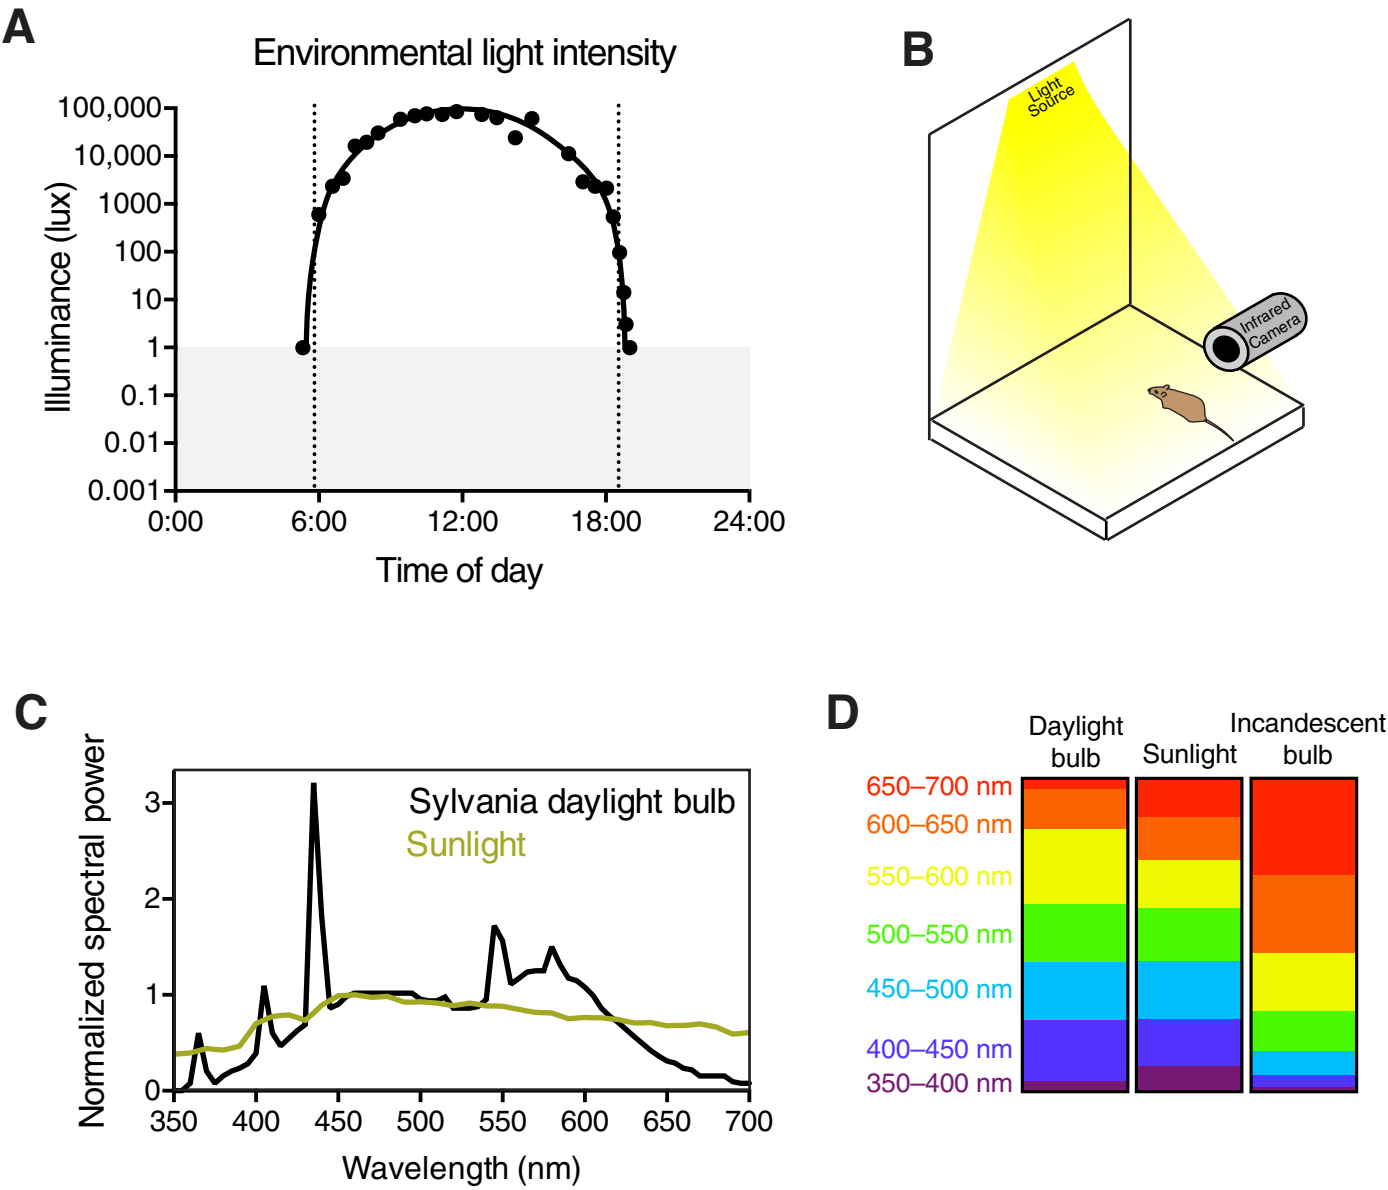

Supplement: supp [file elife-15392-supp-v2.zip]

Figure 2—figure supplement 5

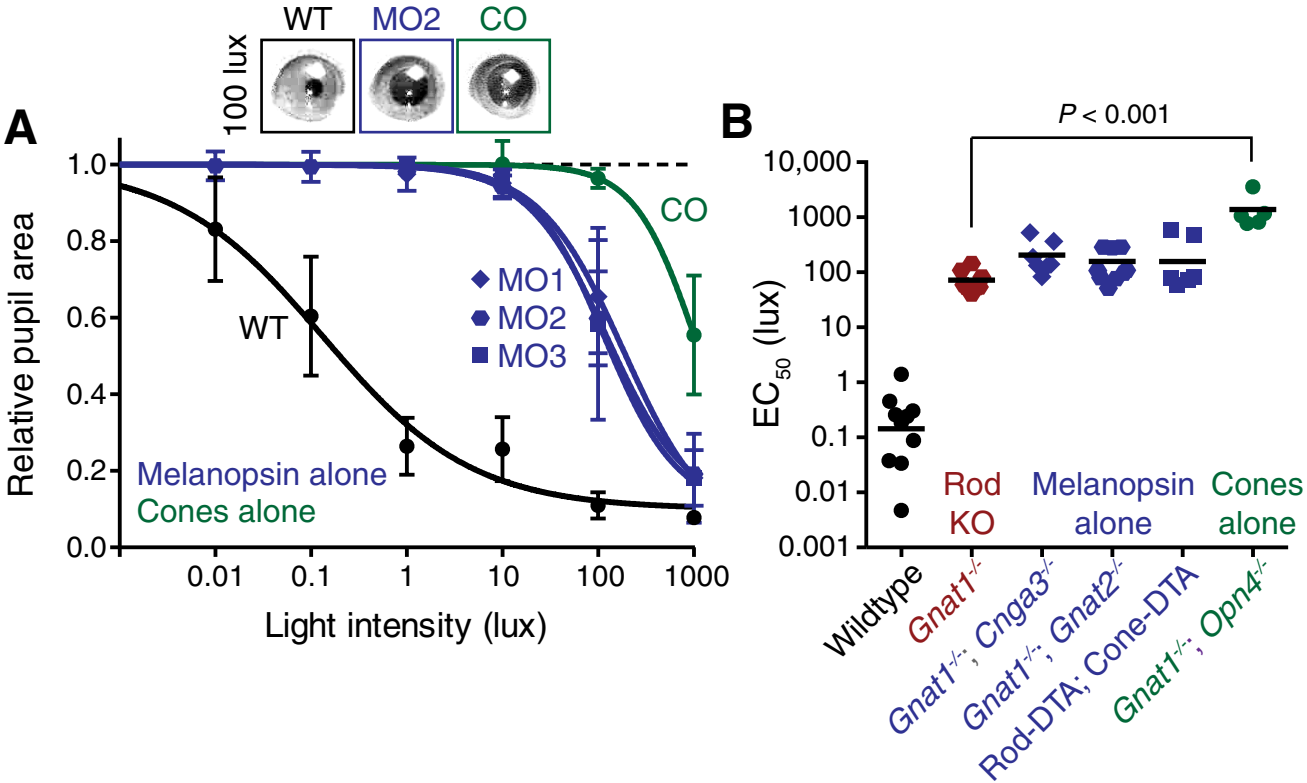

Supplement: supp [file elife-15392-supp-v2.zip]

**Figure 5 — Figure Supplement 1**

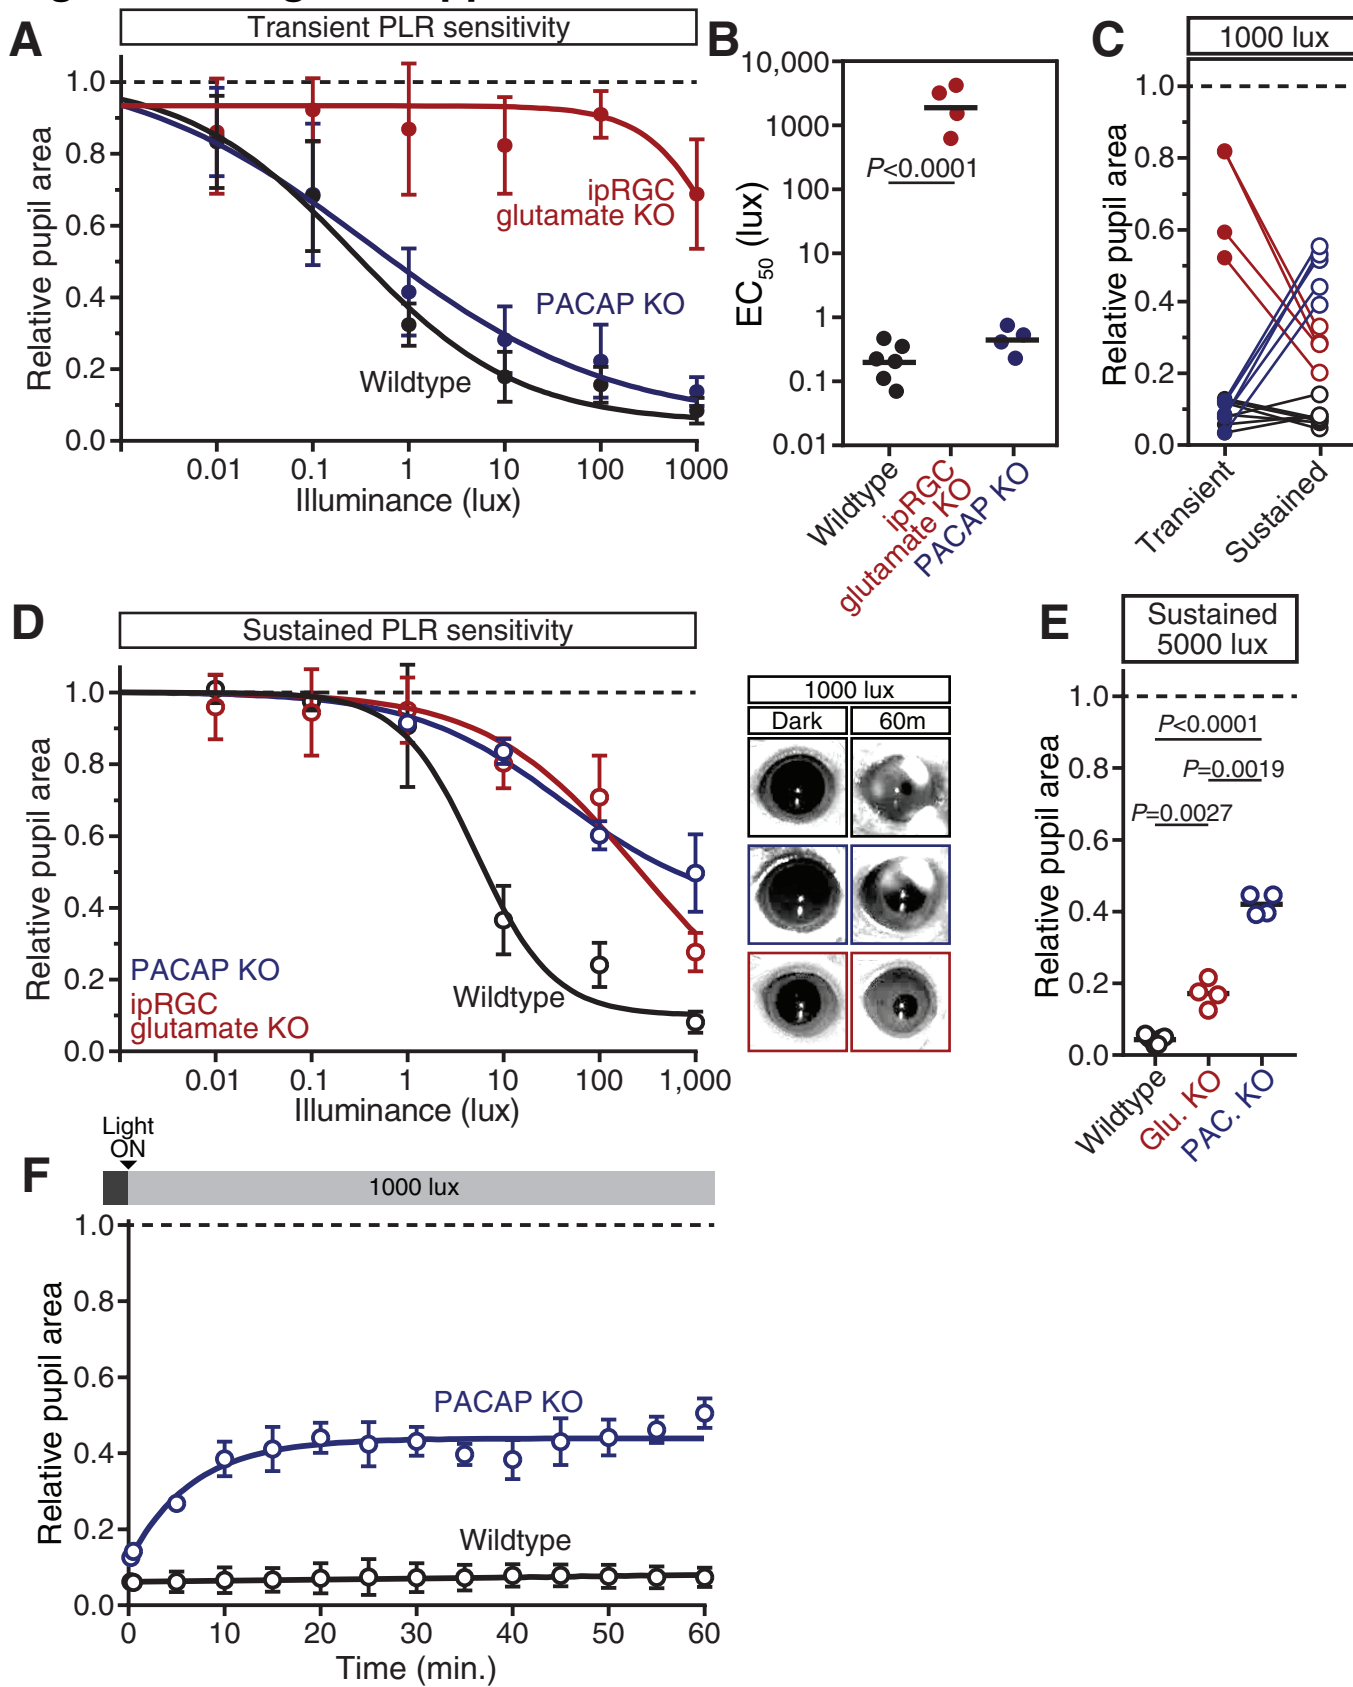

Supplement: supp [file elife-15392-supp-v2.zip]

Figure 3—figure supplement 1

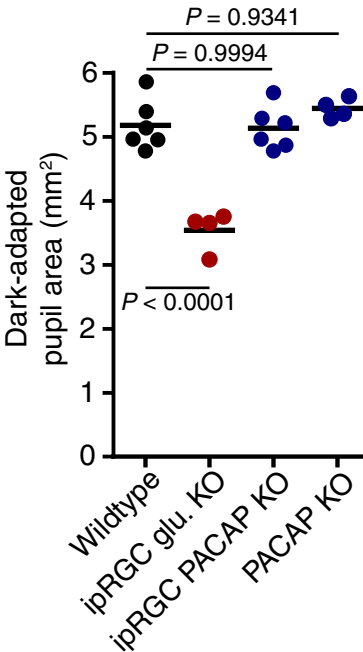

Supplement: supp [file elife-15392-supp-v2.zip]
